# Supplementary material
Source: MDPI journal article supplement (https://www.mdpi.com/2076-3417/9/14/2846)

Article

# Chalcones and Flavanones Bearing Hydroxyl and/or Methoxyl Groups: Synthesis and Biological Assessments

Gonçalo P. Rosa <sup>1</sup>, Ana M. L. Seca <sup>1,2</sup>, Maria do Carmo Barreto <sup>1</sup>, Artur M. S. Silva <sup>2</sup> and Diana C. G. A. Pinto <sup>2\*</sup>,

<sup>1</sup> cE3c- Centre for Ecology, Evolution and Environmental Changes/ Azorean Biodiversity Group & University of Azores, Rua Mãe de Deus, 9501-801 Ponta Delgada, Portugal; [goncalo.p.rosa@uac.pt](mailto:goncalo.p.rosa@uac.pt); [maria.cr.barreto@uac.pt](mailto:maria.cr.barreto@uac.pt); [ana.ml.seca@uac.pt](mailto:ana.ml.seca@uac.pt)

<sup>2</sup> QOPNA & LAQV-REQUIMTE, Department of Chemistry, University of Aveiro, 3810-193 Aveiro, Portugal; [artur.silva@ua.pt](mailto:artur.silva@ua.pt); [diana@ua.pt](mailto:diana@ua.pt)

\* Correspondence: [diana@ua.pt](mailto:diana@ua.pt); Tel.: +351 234 401 407 (D.C.G.A.P.)

**Figure S1.** <sup>1</sup>H NMR spectrum of compound 1.

**Figure S2.** <sup>13</sup>C NMR spectrum of compound 1.

**Figure S3.** HSQC NMR spectrum of compound 1.

**Figure S4.** HMBC NMR spectrum of compound 1.

**Figure S5.** ESI(+) Mass spectrum of compound 1.

**Figure S6.** <sup>1</sup>H NMR spectrum of compound 4.

**Figure S7.** <sup>13</sup>C NMR spectrum of compound 4.

**Figure S8.** HSQC NMR spectrum of compound 4.

**Figure S9.** HMBC NMR spectrum of compound 4.

**Figure S10.** Antioxidant activity (%) presented by the compounds tested at three concentrations in the DPPH assay.

**Figure S11.** Antioxidant activity (%) presented by the compounds tested at three concentrations in the ABTS assay.

**Figure S12.** BuChE inhibitory activity (%) presented by the compounds tested at three concentrations.

**Figure S13.** Inhibition of *M. luteus* growth (%) of the compounds tested at three concentrations.

**Figure S14.** Inhibition of *B. subtilis* growth (%) of the compounds tested at three concentrations.

**Figure S15.** Inhibition of A549 cell-line growth (%) of the compounds tested at three concentrations.

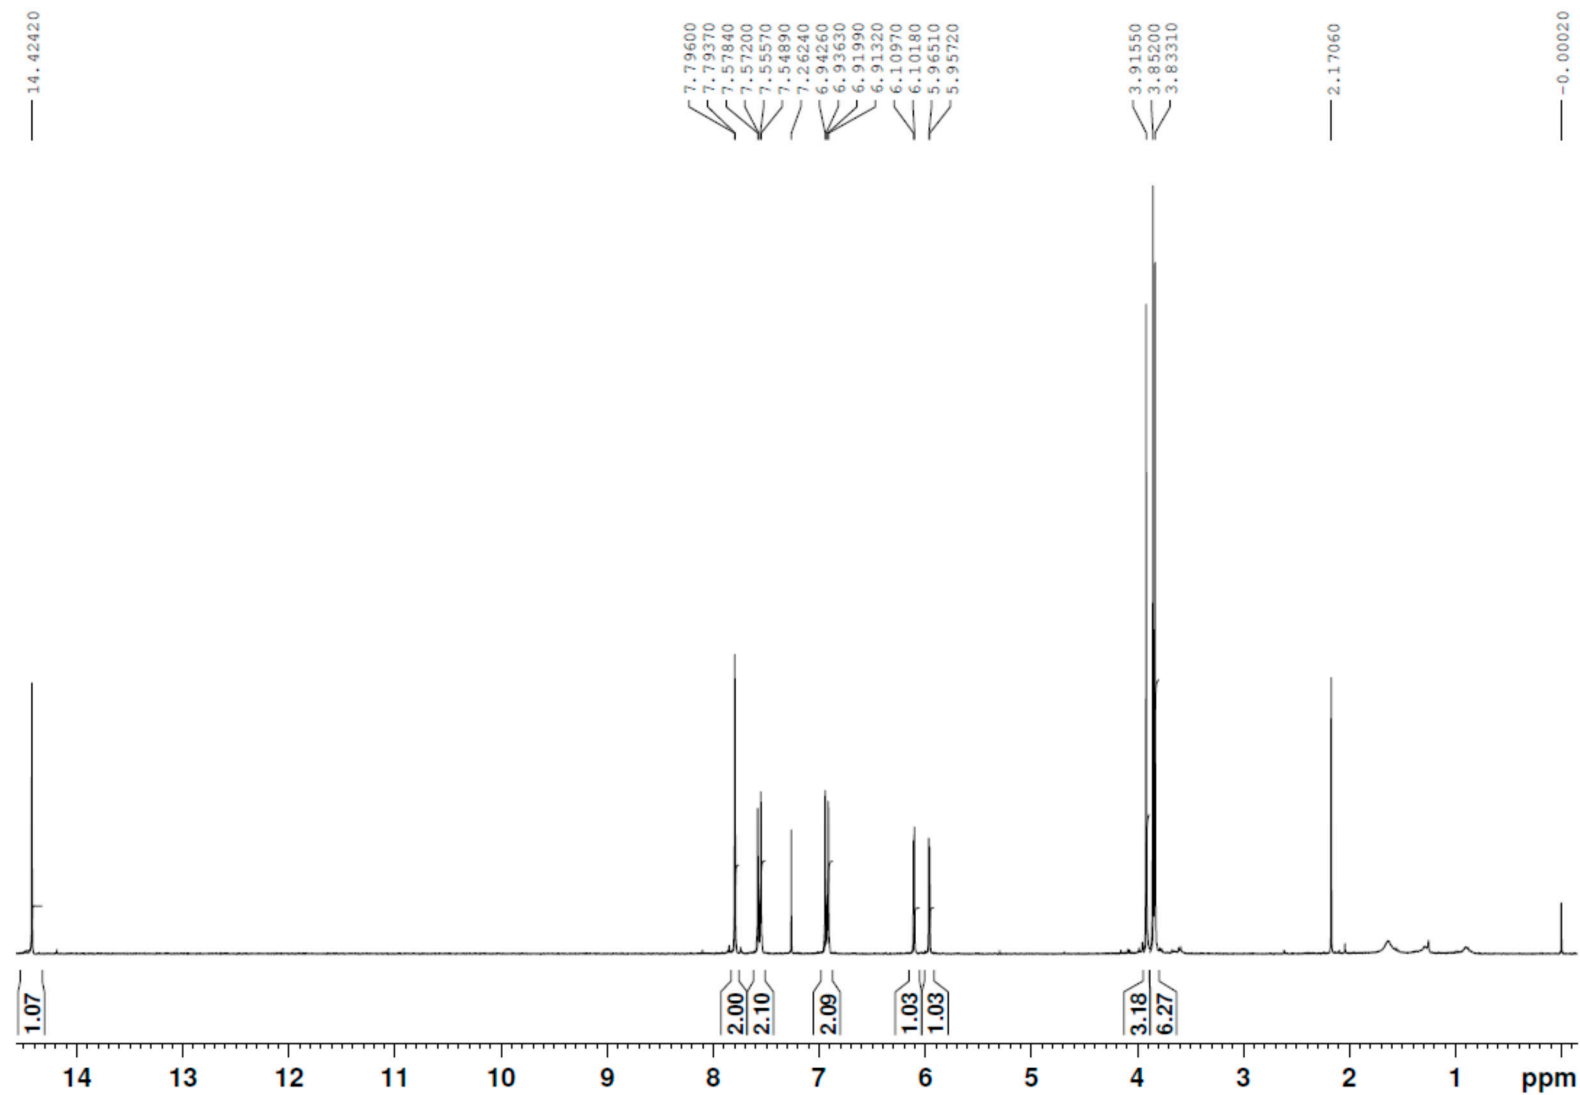Figure S1.  $^1\text{H}$  NMR spectrum of compound 1.

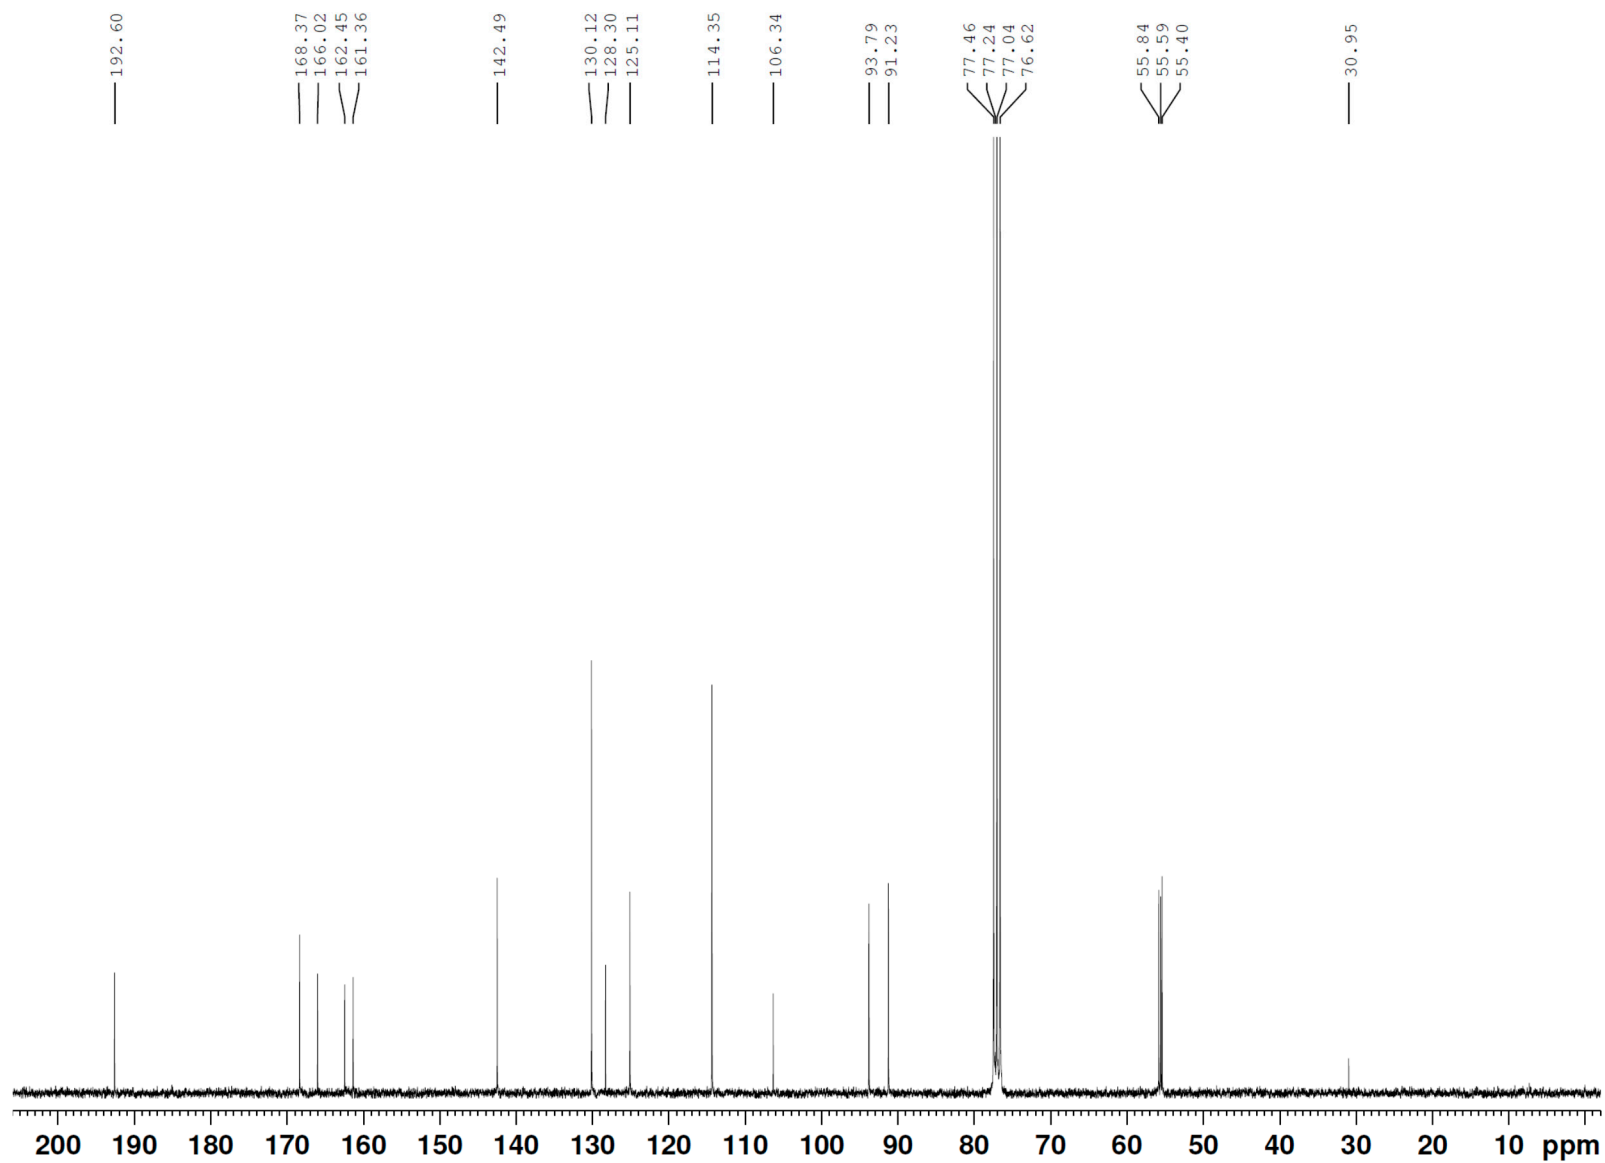Figure S2. <sup>13</sup>C NMR spectrum of compound 1.

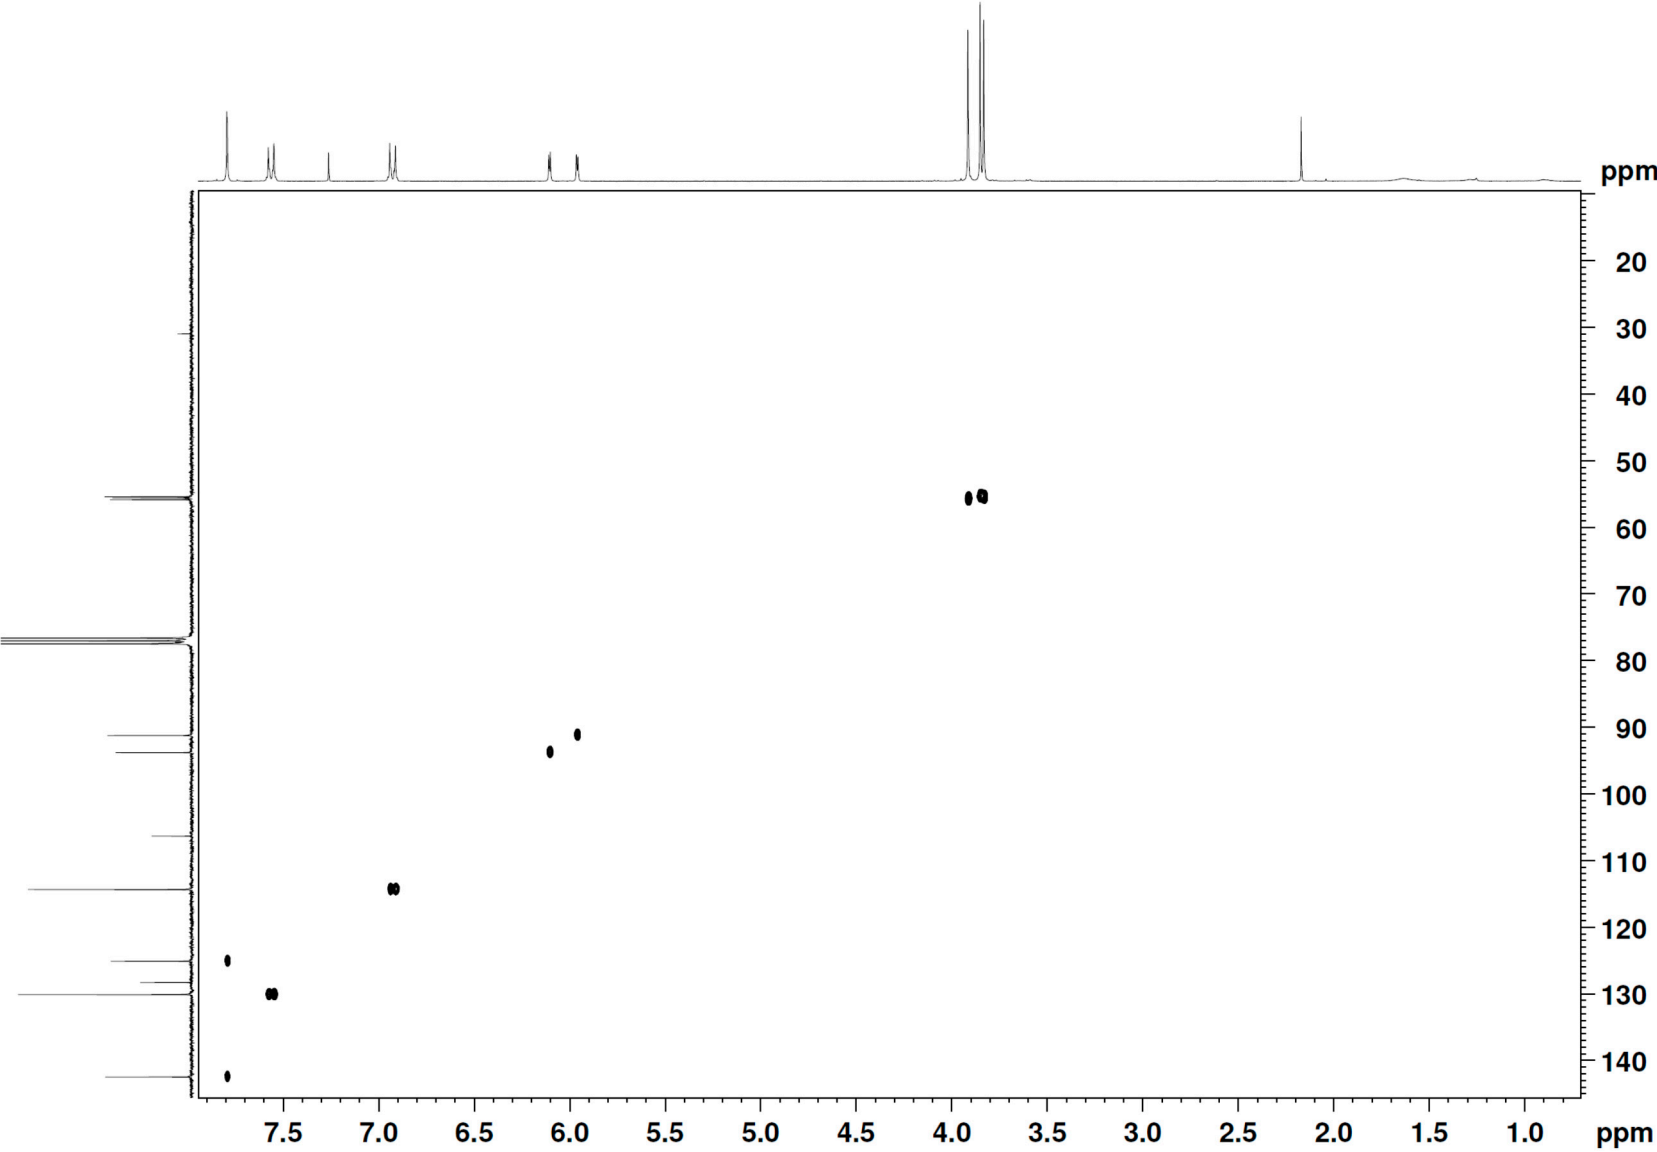

Figure S3. HSQC NMR spectrum of compound 1.

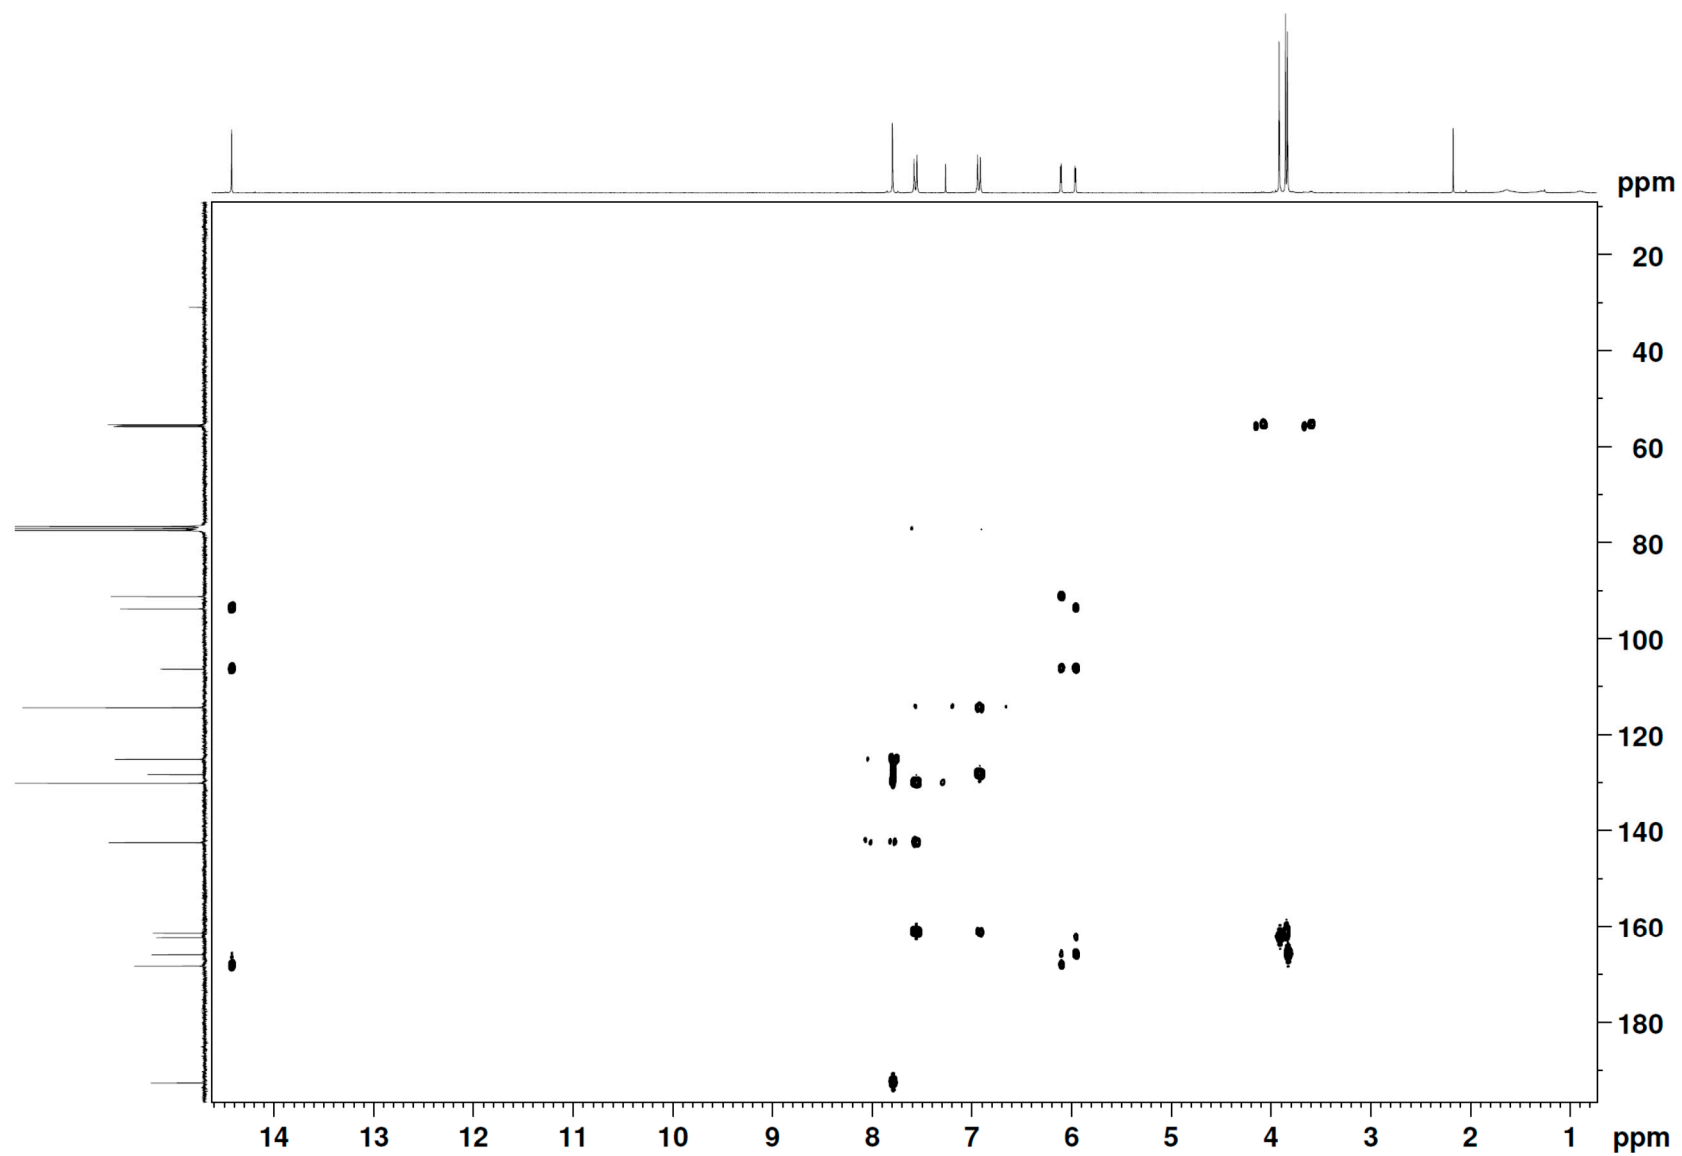

Figure S4. HMBC NMR spectrum of compound 1.

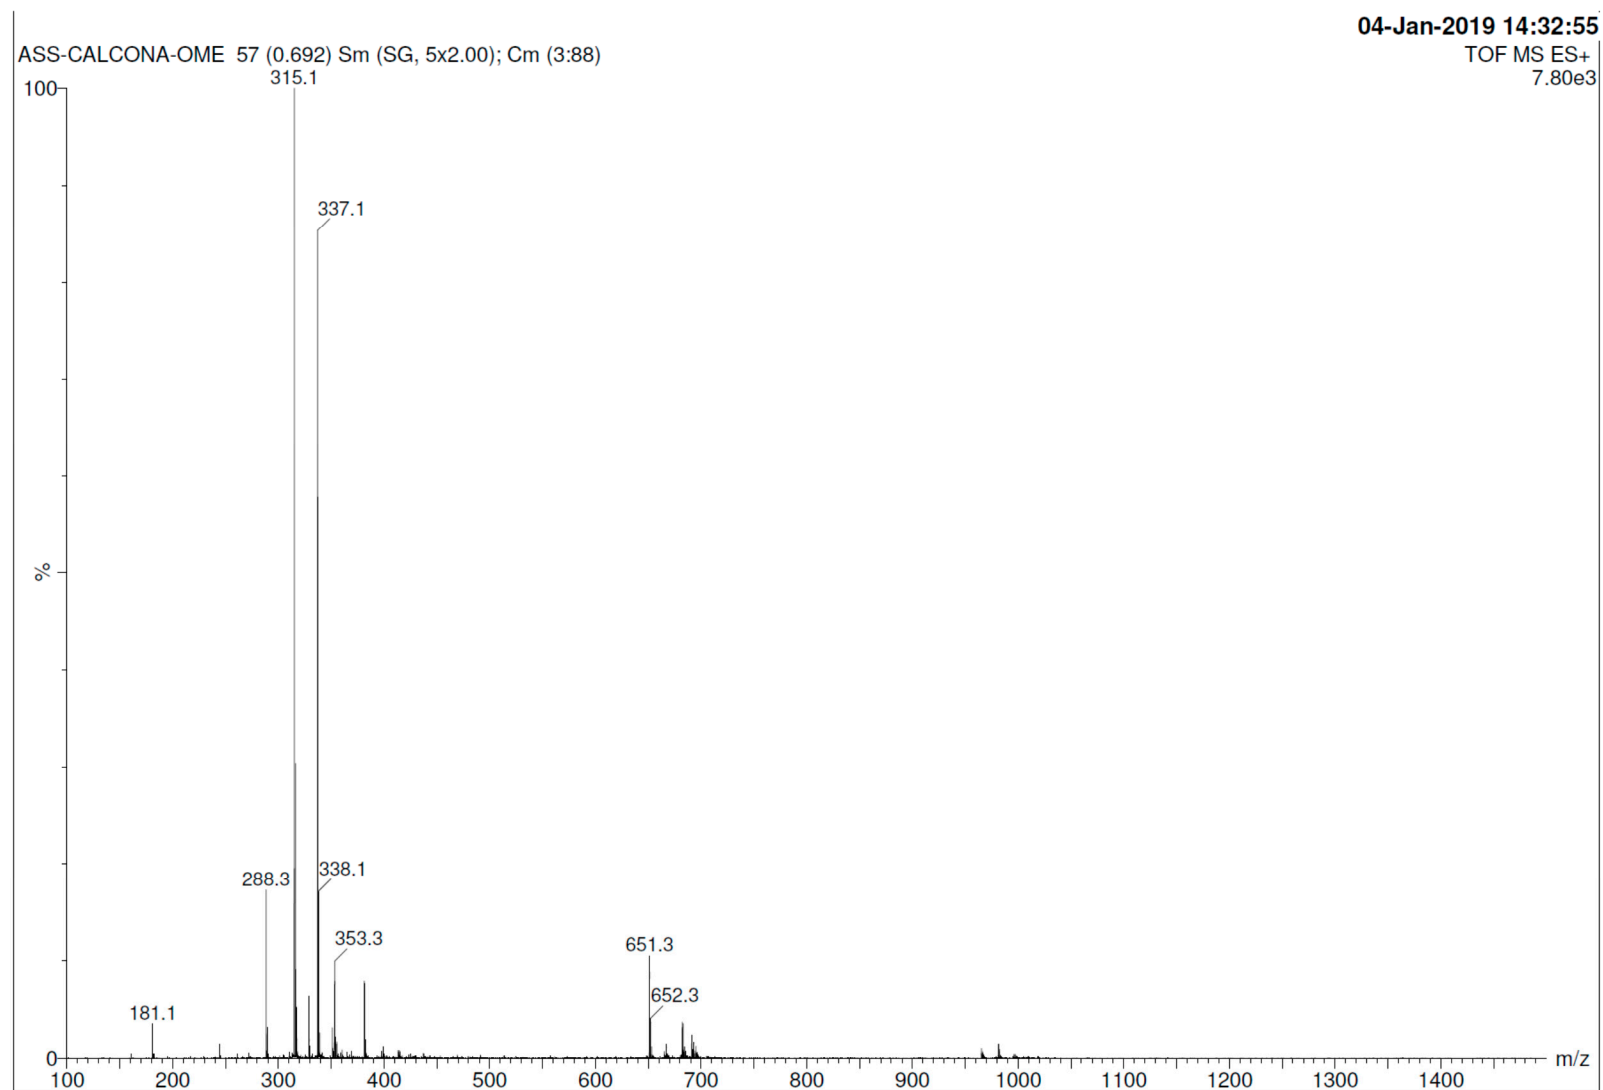

Figure S5. Mass spectrum of compound 1

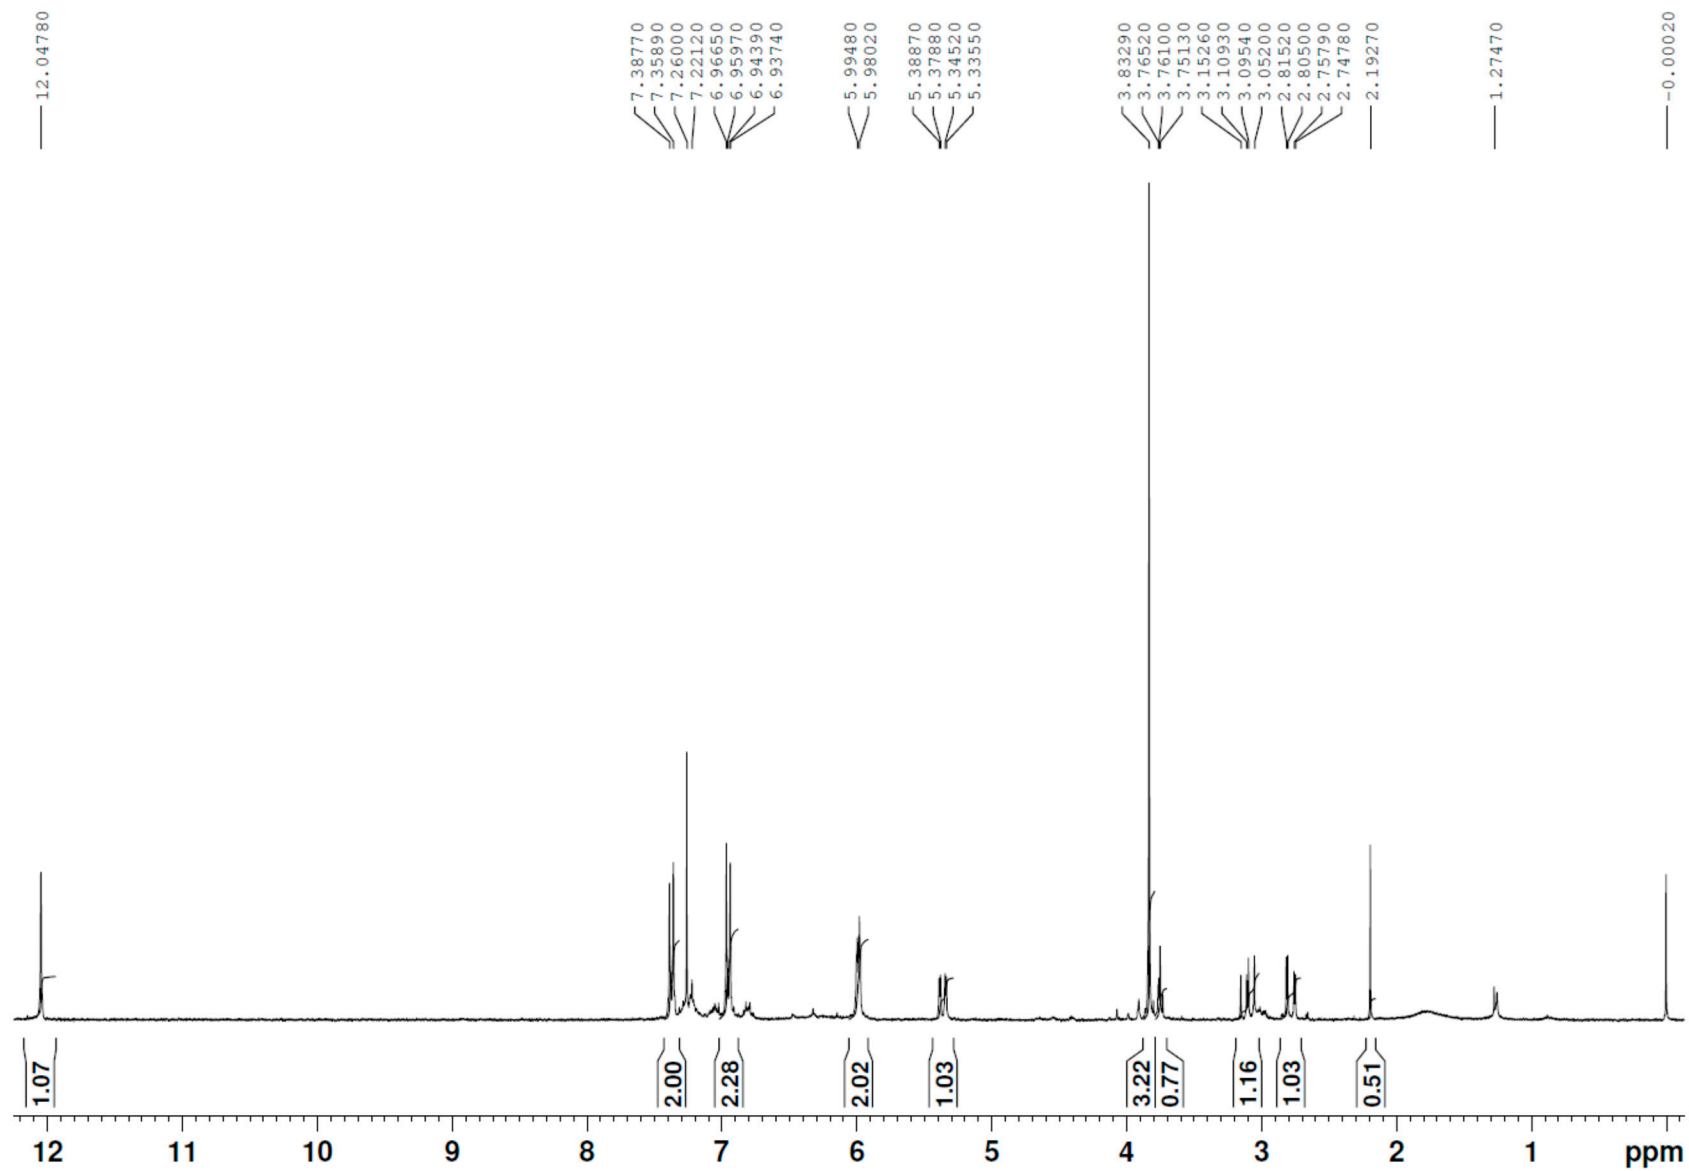Figure S6. <sup>1</sup>H NMR spectrum of compound 4.

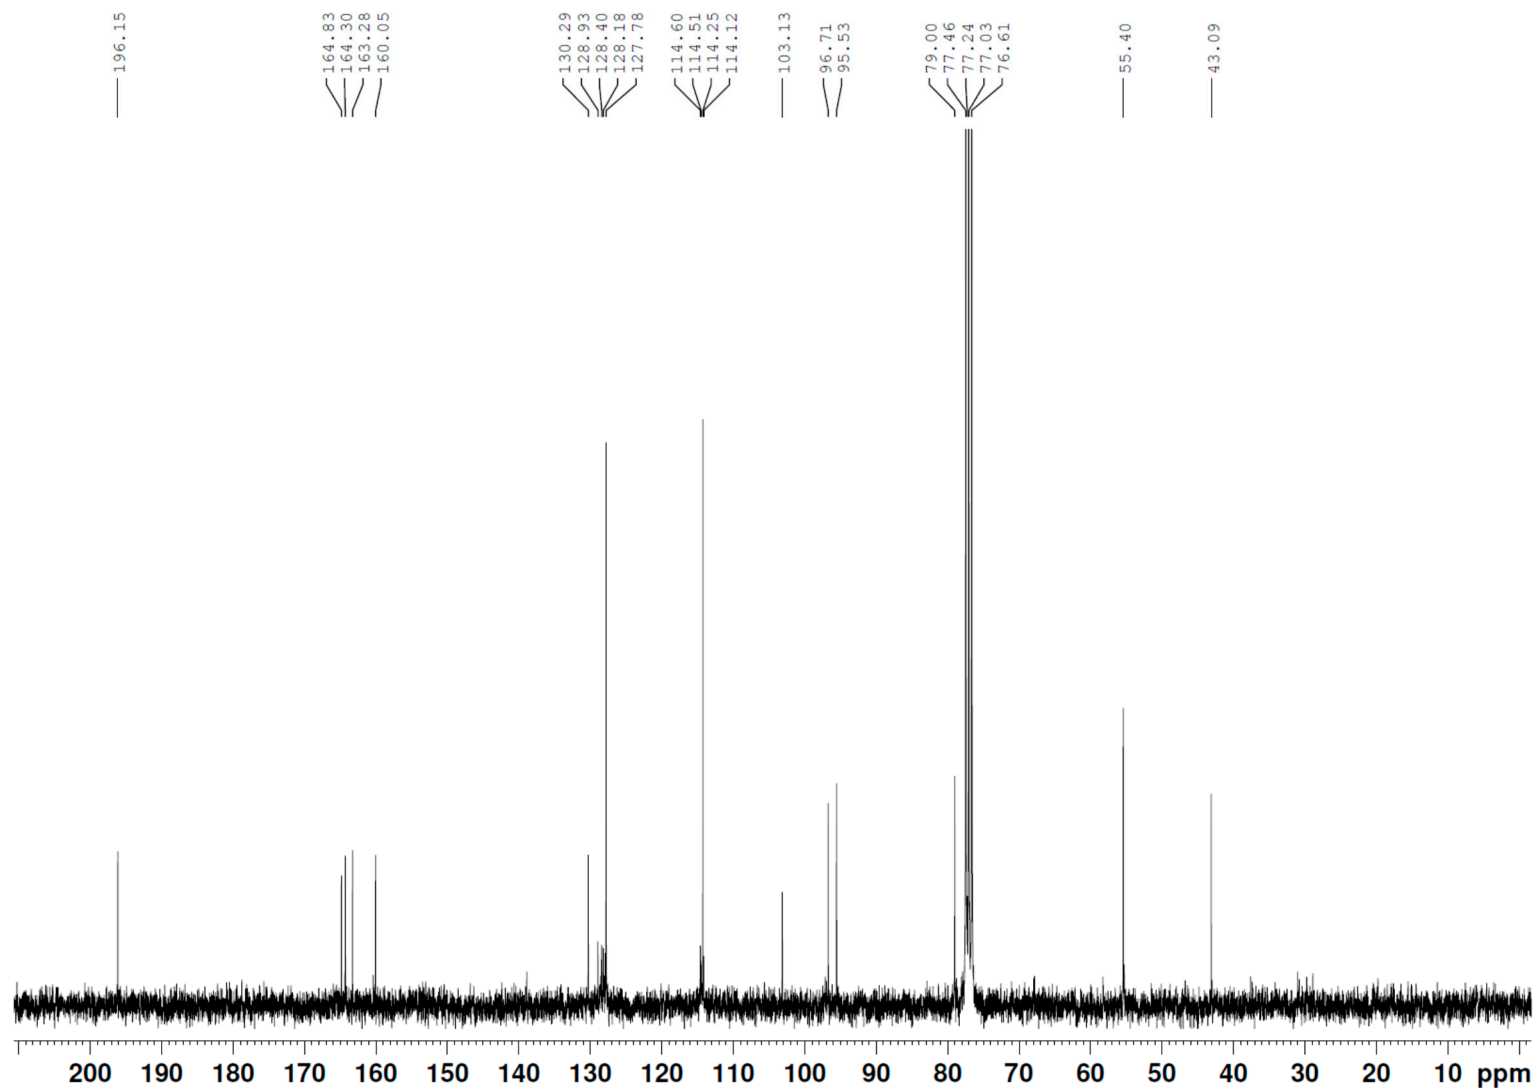

Figure S7.  $^{13}\text{C}$  NMR spectrum of compound 4.



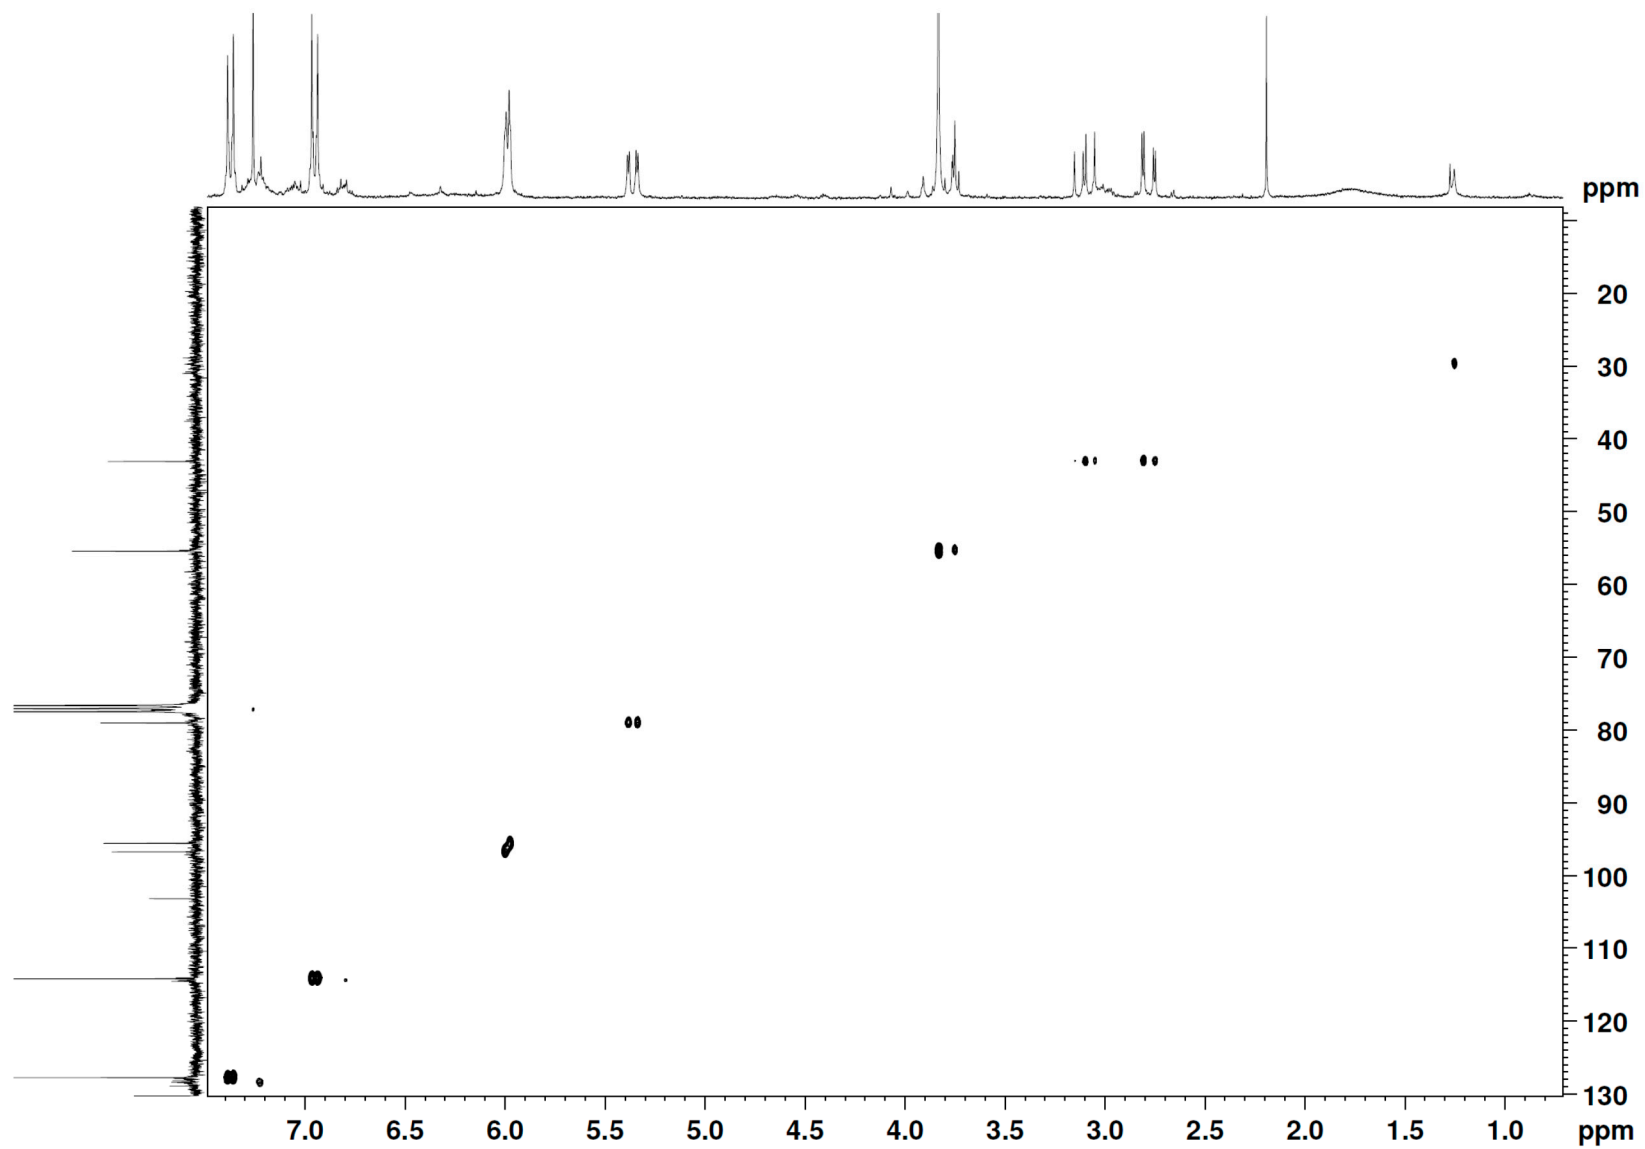

Figure S8. HSQC NMR spectrum of compound 4.

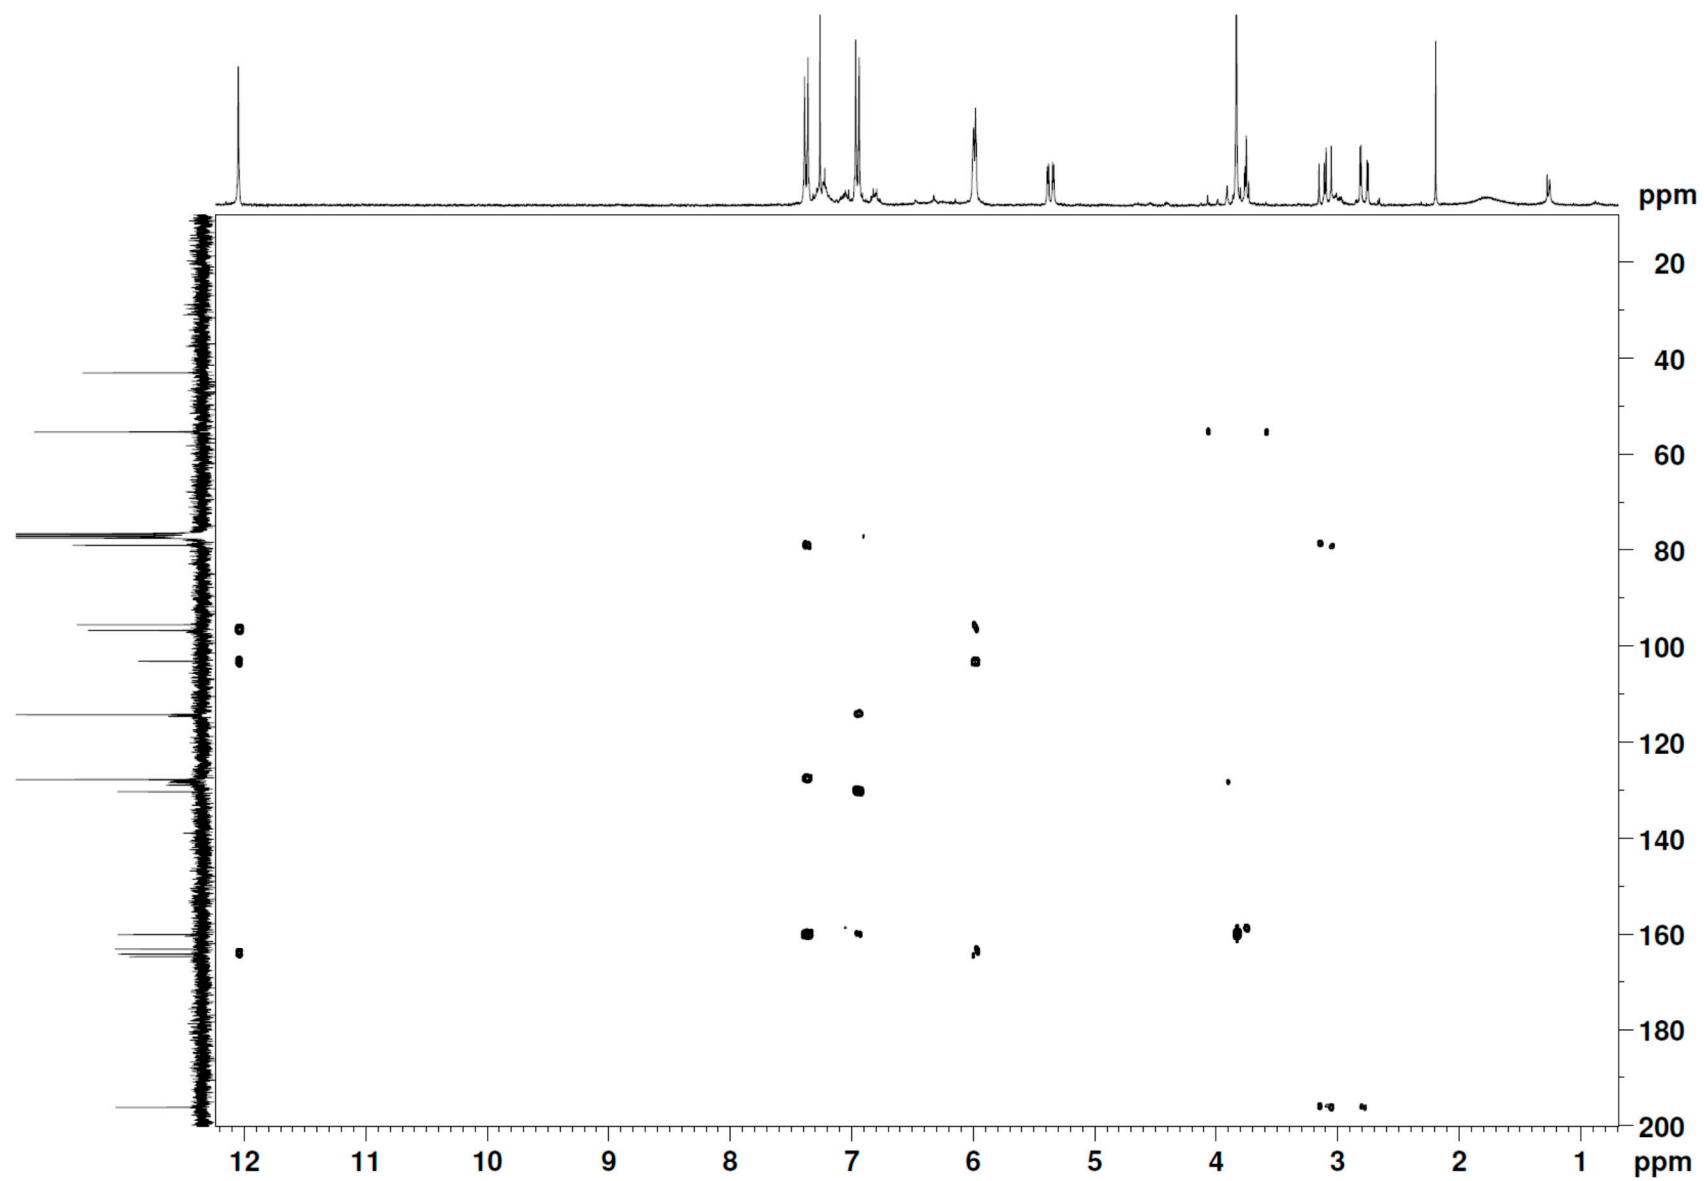

Figure S9. HMBC NMR spectrum of compound 4.

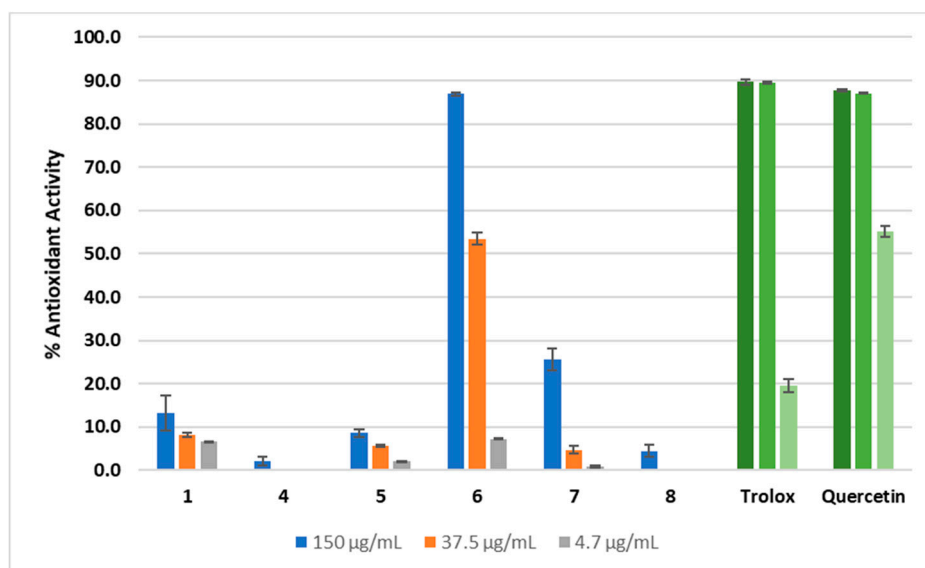

**Figure 10.** Antioxidant activity (%) presented by the compounds tested at three concentrations in the DPPH assay. The green bars represent the results for the reference compounds: quercetin and trolox (100, 25 and 3.13 µg/mL).

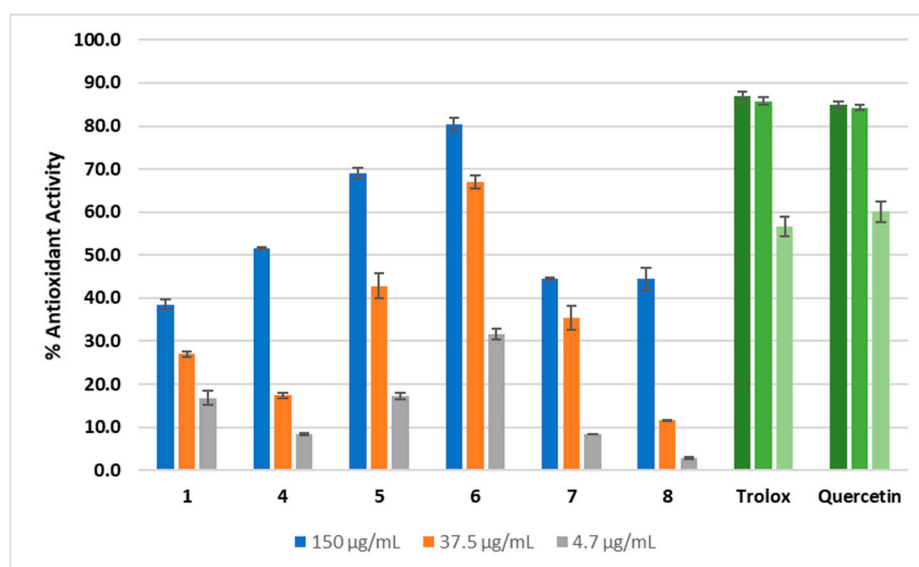

**Figure 11.** Antioxidant activity (%) presented by the compounds tested at three concentrations in the ABTS assay. The green bars represent the results for the reference compounds: quercetin and trolox (100, 25 and 3.13 µg/mL).

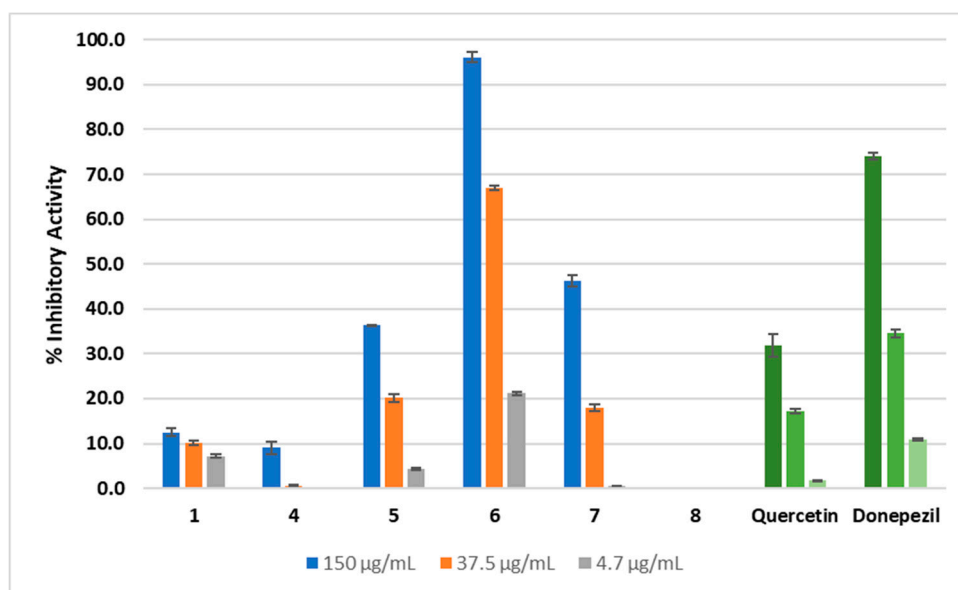

**Figure 12.** BuChE inhibitory activity (%) presented by the compounds tested at three concentrations. The green bars represent the results for the reference compounds: quercetin (100, 25 and 3.13 µg/mL) and donepezil (50, 12.5 and 1.56 µg/mL).

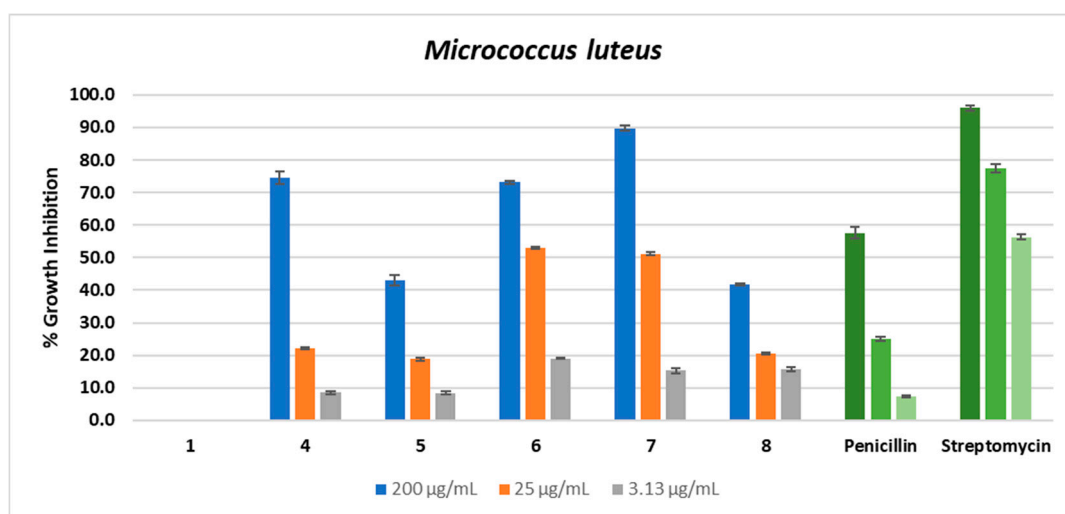

**Figure 13.** Inhibition of *M. luteus* growth (%) of the compounds tested at three concentrations. The green bars represent the results for the reference compounds: penicillin (10, 1.25 and 0.16 µg/mL) and streptomycin (40, 5 and 0.63 µg/mL).

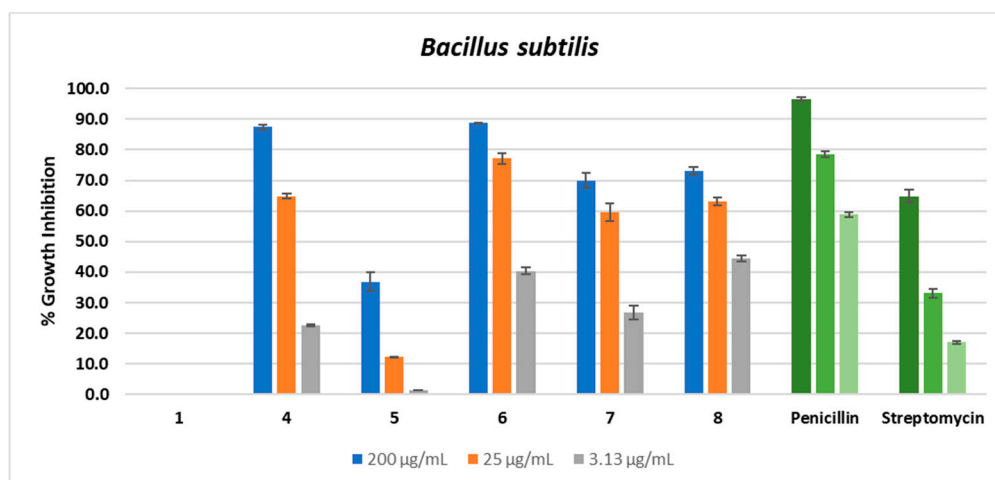

**Figure 14.** Inhibition of *B. subtilis* growth (%) of the compounds tested at three concentrations. The green bars represent the results for the reference compounds: penicillin (10, 1.25 and 0.16 µg/mL) and streptomycin (20, 2.5 and 0.31 µg/mL).

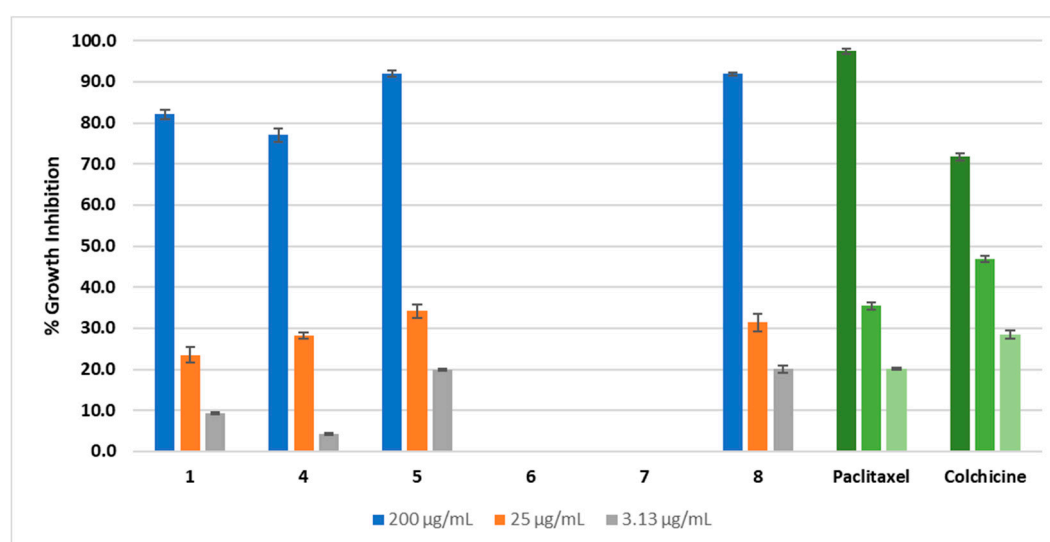

**Figure 15.** Inhibition of A549 cell-line growth (%) of the compounds tested at three concentrations. The green bars represent the results for the reference compounds: Paclitaxel and colchicine (10, 1.25 and 0.16 µg/mL).

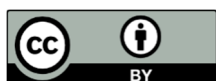

Supplement: s1 [file s1]
